# Supplementary material for: Disruption of an N-acetyltransferase gene in the silkworm reveals a novel role in pigmentation
Source: Oxford University Press journal article supplement (doi:10.1242/dev.053678), 2010-11-09
Supplement: dev053678supptables2.pdf [file dev053678supptables2.pdf]

**Table S2. Detailed information on 13 predicted genes (C1-C13) within the candidate regions and reasons for further screening or otherwise**

| Candidate | Gene name*    | Length (bp) | Annotation: best hit with E-value                                                             | Exclusion reason                                                       |
|-----------|---------------|-------------|-----------------------------------------------------------------------------------------------|------------------------------------------------------------------------|
| C1        | BGIBMGA008531 | 303         | Myb-MuvB complex subunit Lin-52 [ <i>B. mori</i> ]<br>(E-value: 2.00E-39)                     | Two <i>Dazao</i> -specific SNPs                                        |
| C2        | BGIBMGA008532 | 564         | N-acetyltransferase [ <i>B. mori</i> ] (E-value: 5.00E-103)                                   | Identical to <i>Dazao</i>                                              |
| C3        | BGIBMGA008324 | 246         | AGAP002567-PA [ <i>A. gambiae</i> ] (E-value: 8.00E-05)                                       | Two silent SNPs                                                        |
| C4        | BGIBMGA008533 | 1326        | Similar to AGAP001885-PA [ <i>T. castaneum</i> ]<br>(E-value: 3.00E-90)                       | Irrelevant expression pattern                                          |
| C5        | BGIBMGA008323 | 249         | Hypothetical protein SS1G_04978 [ <i>S. sclerotiorum</i> ]<br>(E-value: 4.3)                  | Irrelevant expression pattern                                          |
| C6        | BGIBMGA008322 | 216         | Similar to GA18100-PA [ <i>N. vitripennis</i> ]<br>(E-value: 2.00E-20)                        | Three silent SNPs                                                      |
| C7        | BGIBMGA008534 | 1116        | GK25744 [ <i>D. willistoni</i> ] (E-value: 6.00E-110)                                         | Non- <i>mln</i> -specific insertion;<br>irrelevant expression pattern  |
| C8        | BGIBMGA008535 | 252         | Snrnp48 protein [ <i>D. rerio</i> ] (E-value: 1.2)                                            | One <i>Dazao</i> -specific SNP; one<br><i>Dazao</i> -specific deletion |
| C9        | BGIBMGA008536 | 1131        | Similar to zinc-finger CCCH-type containing 14<br>[ <i>T. castaneum</i> ] (E-value: 4.00E-27) | Irrelevant expression pattern                                          |
| C10       | BGIBMGA008537 | 1350        | Conserved hypothetical protein [ <i>C. quinquefasciatus</i> ]<br>(E-value: 3.00E-33)          | Irrelevant expression pattern                                          |
| C11       | BGIBMGA008538 | 787         | Arylalkylamine N-acetyltransferase [ <i>B. mori</i> ]<br>(E-value: 2.00E-107)                 | <i>mln</i> -specific 126 bp deletion;<br>coincident expression pattern |
| C12       | BGIBMGA008539 | 660         | Arylalkylamine N-acetyltransferase [ <i>A. pernyi</i> ]<br>(E-value: 3.00E-30)                | Identical to <i>Dazao</i>                                              |
| C13       | BGIBMGA008540 | 390         | Similar to AGAP003014-PA [ <i>T. castaneum</i> ]<br>(E-value: 1.00E-28)                       | Identical to <i>Dazao</i>                                              |

\*Duan et al. (2010).
