# Supplementary material for: Disruption of an N-acetyltransferase gene in the silkworm reveals a novel role in pigmentation
Source: Oxford University Press journal article supplement (doi:10.1242/dev.053678), 2010-11-09
Supplement: dev053678supptables4.pdf [file dev053678supptables4.pdf]

**Table S4. Raw radiolabel values detected in the AANAT enzymatic assays with dopamine as substrate and a 20-minute reaction time**

| Proteins            | Amount (ng) | Radiolabel values |
|---------------------|-------------|-------------------|
| wt in DE3           | 10          | 2339              |
|                     | 20          | 4282              |
|                     | 30          | 6992.5            |
| sm in DE3           | 10          | 1373              |
|                     | 20          | 1526              |
|                     | 30          | 1852.5            |
| Ctrl 1*             | –           | 1071              |
| Ctrl 2 <sup>†</sup> | –           | 1190              |

\*No tryptamine/dopamine.

<sup>†</sup>Tryptamine/dopamine added.
